# Supplementary material for: Studying the interactions of a platinum(ii) 9-aminoacridine complex with proteins and oligonucleotides by ESI-TOF MS
Source: Royal Society of Chemistry journal article supplement (doi:10.1039/c1dt11506e), 2011-11-17
Supplement: c1dt11506e.pdf [file c1dt11506e.pdf]

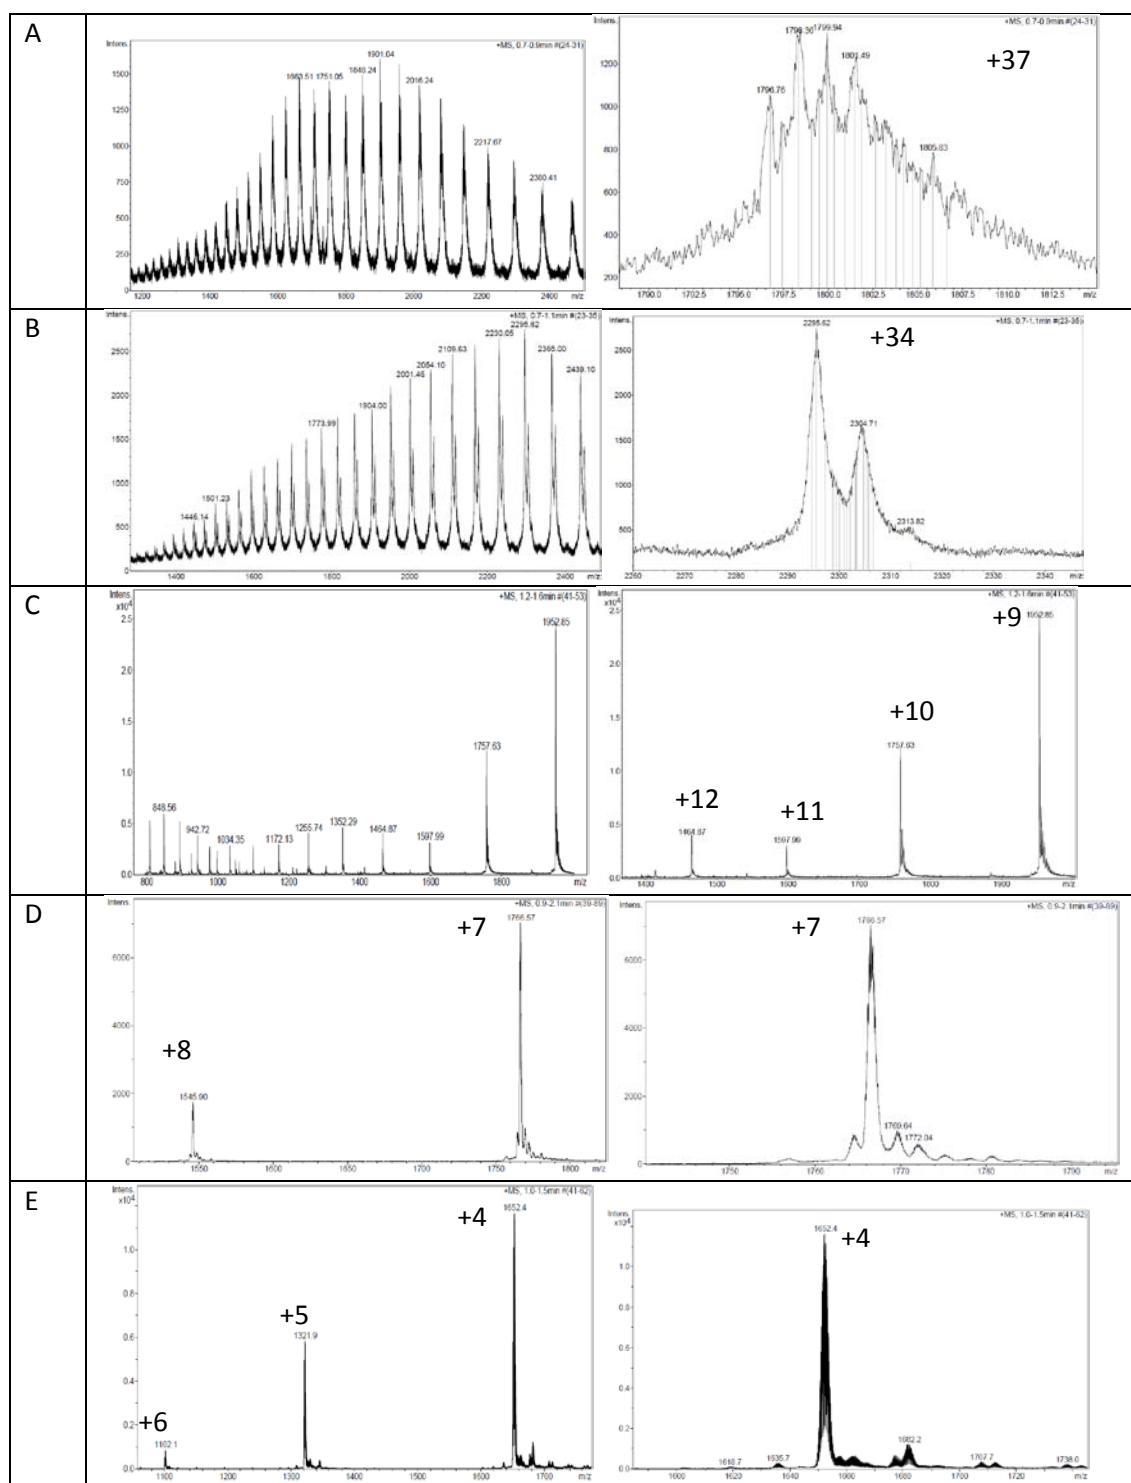

**Figure S1.** Mass spectra recorded and an appropriate zoom for the proteins used in this work, determined by ESI-TOF MS under the experimental conditions used in this work: (A) human serum albumin, (B) transferrin, (C) myoglobin, (D) cytochrome C and (E) mouse metallothionein MT1 isoform. The numbers preceded by the “+” symbol denote the charge state of the protein analyzed. The experimental error associated with the mass determination was always lower than 0.5 %.
